# Supplementary material for: The naturally occurring radioactivity of ‘scalar energy’ pendants and concomitant radiation risk
Source: PubMed Central journal article supplement (PMC8168844; doi:10.1371/journal.pone.0250528), 2021-06-01

**S1 Fig.** Detection of radionuclides using a Survey Meter, type identiFINDER 2.

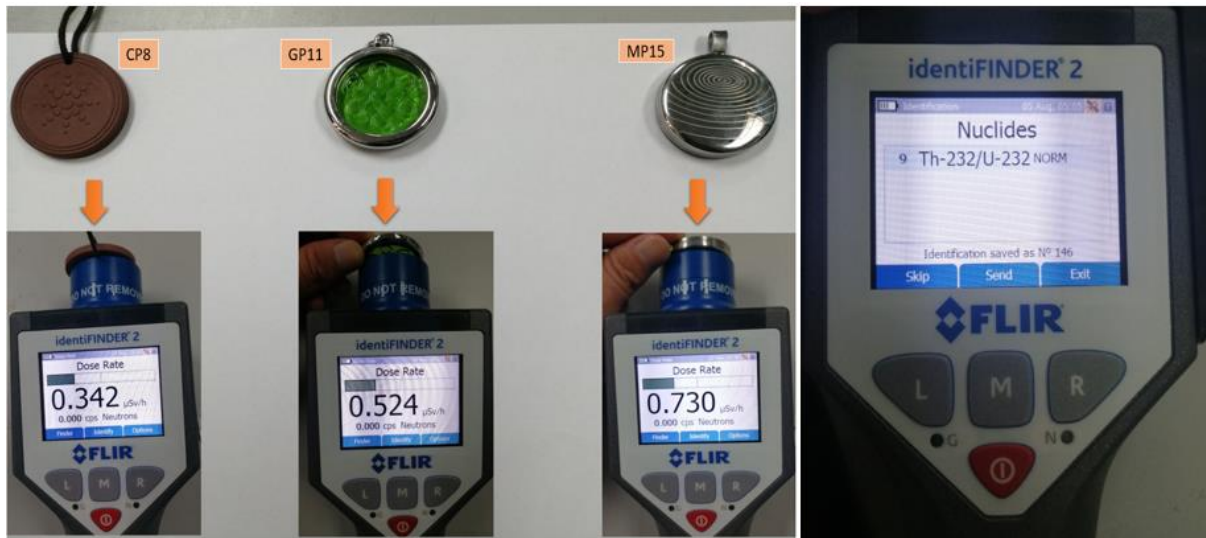

Supplement: pone.0250528.s001.pdf [file pone.0250528.s001.pdf]
